# Supplementary material
Source: PubMed Central journal article supplement (PMC553308)

**A**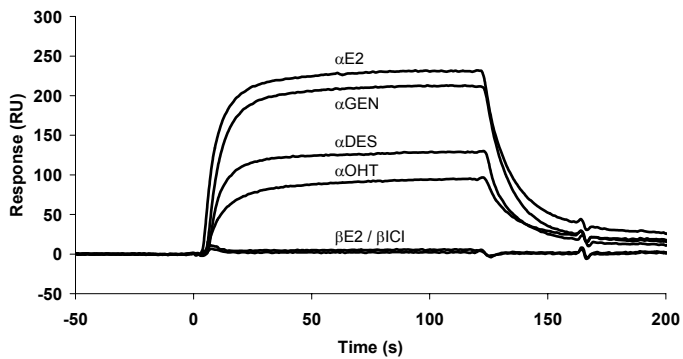**B**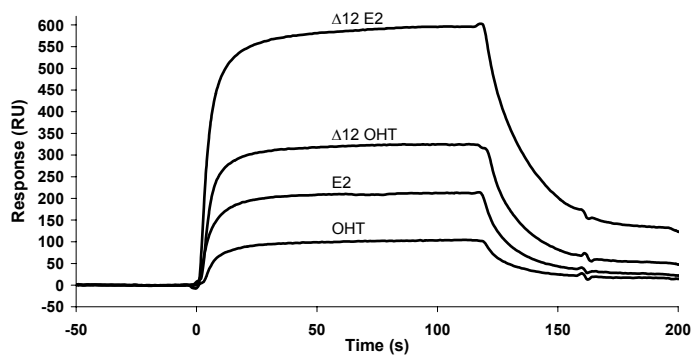**C**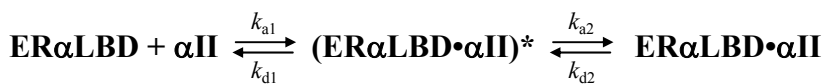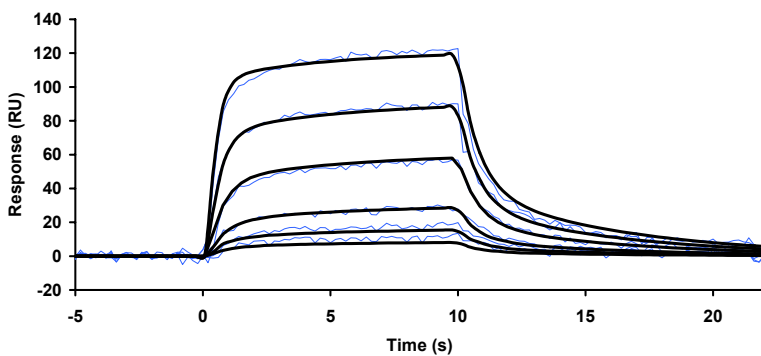

Supplement: pnas_102_10_3593__2.pdf [file pnas_102_10_3593__2.pdf]

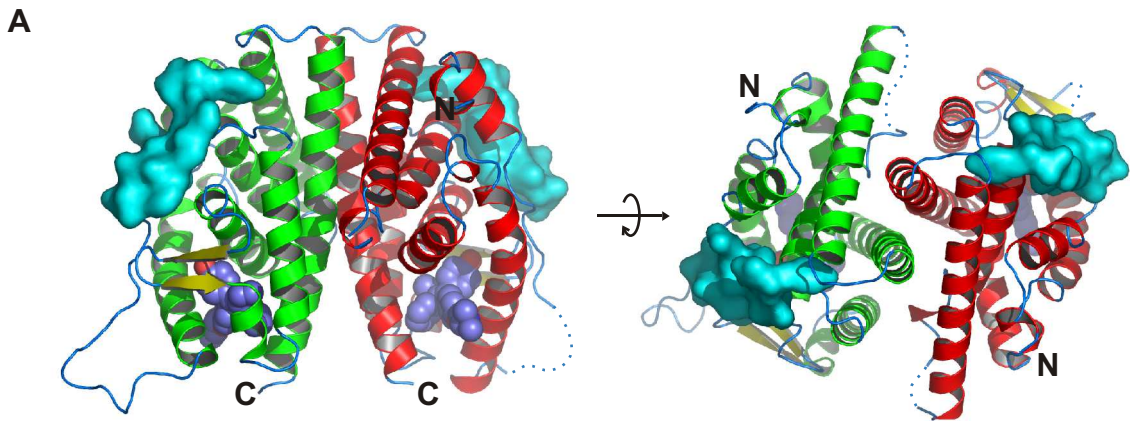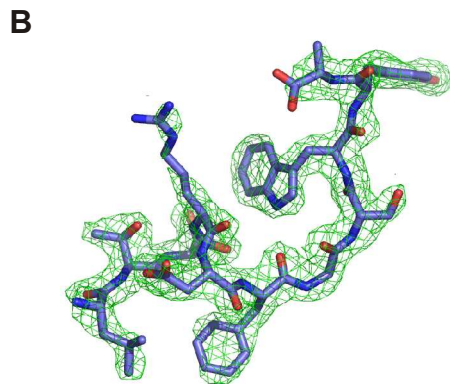

Supplement: pnas_102_10_3593__3.pdf [file pnas_102_10_3593__3.pdf]
